# Supplementary material for: Natural Rigid and Hard Plastic Fabricated from Elastomeric Degradation of Natural Rubber Composite with Ultra-High Magnesium Carbonate Content
Source: MDPI journal article supplement (doi:10.3390/polym15143078), 2023-07-18
Supplement: s1 [file s1]

*Supplementary*

# **Natural Rigid and Hard Plastic Fabricated from Elastomeric Degradation of Natural Rubber Composite with Ultra-High Magnesium Carbonate Content**

**Abedeem Dasaesamoh, Kittikhun Khotmungkhun and Kittitat Subannajui \***

Material Science and Engineering Program, School of Materials Science and Innovation,  
Faculty of Science, Mahidol University, Bangkok 10400, Thailand;  
kittikhun.kho@alumni.mahidol.ac.th (K.K.)

\* Correspondence: kittitat.sub@mahidol.ac.th

**Figure S1.** a) Abrasion test of  $\text{Al}_2\text{O}_3/\text{NR}$  composites b) Abrasion test of  $\text{SiO}_2/\text{NR}$  composites c) Hardness of  $\text{Al}_2\text{O}_3/\text{NR}$  composites d) Hardness of  $\text{SiO}_2/\text{NR}$  composites

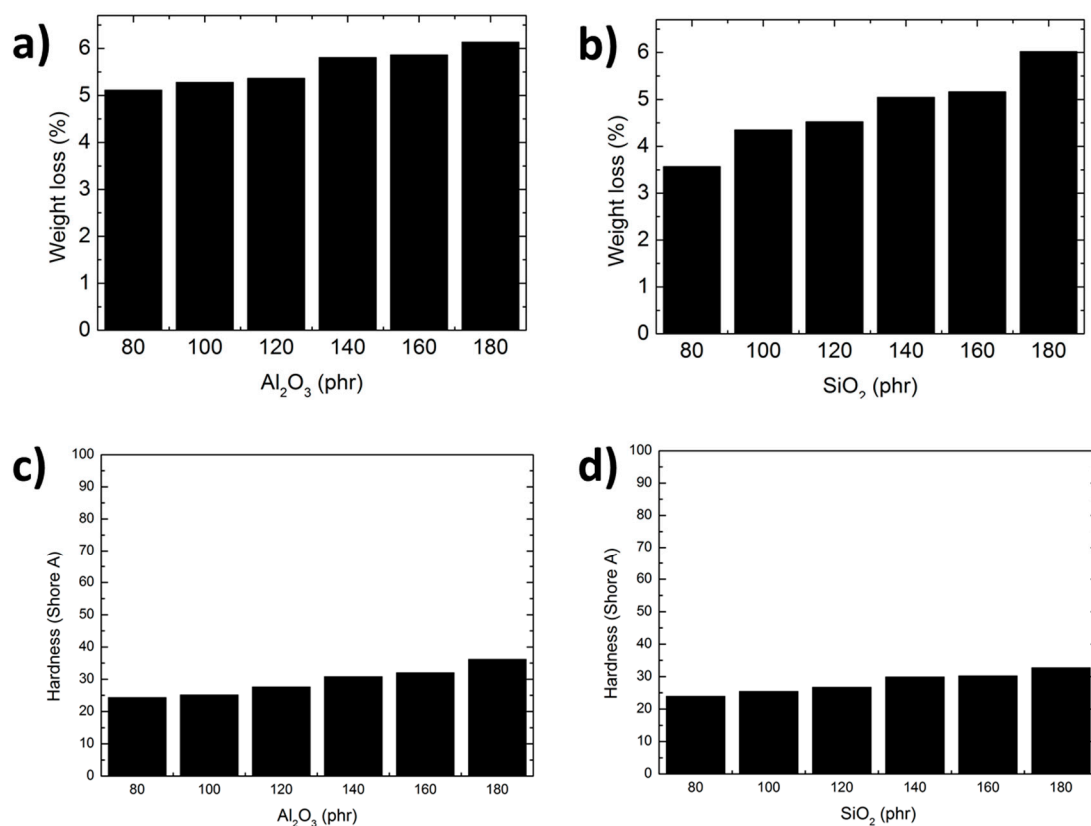

**Table S1.** The molecular weight of 0 Phr natural rubber measured by GPC-SEC

| Molecular weight<br>g/mol | Mp    | Mn   | Mw    | Mz    |
|---------------------------|-------|------|-------|-------|
| 0 Phr                     | 17387 | 9043 | 15198 | 21690 |
